1 Quantifying male and female pheromone-based mate choice in *Caenorhabditis* nematodes using  
2 a novel microfluidic technique

3

4 Flora Borne<sup>1,2, #a, ¶</sup>, Katja R. Kasimatis<sup>2¶</sup>, and Patrick C. Phillips<sup>2\*</sup>

5

6 <sup>1</sup>Ecole Normale Supérieure Paris-Saclay, Université Paris-Saclay, Cachan, France

7

8 <sup>2</sup>Institute of Ecology and Evolution, University of Oregon, Eugene, Oregon, United States of  
9 America

10

11 \*Corresponding author

12 Email: [pphil@uoregon.edu](mailto:pphil@uoregon.edu) (PCP)

13

14 ¶These authors contributed equally to this work.

15

## 16 **Abstract**

17 Pheromone cues are an important component of intersexual communication, particularly in  
18 regards to mate choice. *Caenorhabditis* nematodes predominant rely on pheromone production  
19 for mate finding and mate choice. Here we describe a new microfluidic paradigm for studying  
20 mate choice in nematodes. Specifically, the Pheromone Arena allows for a constant flow of small  
21 molecule signals to be passed in real time from signaling worms to those making a choice  
22 without any physical contact. We validated this microfluidic paradigm by corroborating previous  
23 studies in showing that virgin *C. remanei* and *C. elegans* males have a strong preference for  
24 virgin females over mated ones. Moreover, our results suggest that the strength of attraction is an  
25 additive effect of male receptivity and female signal production. We go on to explicitly examine  
26 female choice and find that females are more attracted to virgin males. However, a female's mate  
27 choice is strongly dependent on her mating status.

28

## 29 **Introduction**

30 A critical component of sexual reproduction is the ability to find and recognize the  
31 appropriate individual with which to mate. Individuals must be able to distinguish members of  
32 their own species – namely, conspecifics – from those of other species – heterospecifics. Perhaps  
33 equally important, is the ability to choose high quality individuals that are receptive to mating.  
34 The process of mate choice is shaped by sexual selection and relies on communication between  
35 the sexes [1-3]. In particular, sex pheromones – small chemicals produced by a signaler to induce  
36 a sexual response in a receiver – are a major means of intersex communication across a wide  
37 variety of both invertebrate and vertebrate taxa [reviewed in 4]. Some of the best studied sex

38 pheromones are the cuticular hydrocarbon family found in many insect species [5,6]. These  
39 pheromones have both species-specific and sex-specific effects [6]. For example, in *Drosophila*  
40 female hydrocarbons attract males, while male hydrocarbons have an anti-aphrodisiac effect on  
41 other males and increase female receptivity [7-9]. While these studies highlight the importance  
42 of pheromones in mate choice, many of the taxa studied have additional behaviors and traits that  
43 contribute to the mate choice process, potentially confounding the relative reliance on  
44 pheromone-based cues.

45 *Caenorhabditis* nematodes rely almost exclusively on pheromone signals for mate choice  
46 [10,11]. Pheromone signals in *Caenorhabditis* have traditionally been studied using plate-based  
47 chemotaxis assays, where male attraction is quantified based on his ability to discriminate  
48 between a control medium and a female-conditioned medium [12,13]. In particular, these studies  
49 have identified ascaroside pheromones as important in mate choice signaling due to their sex-  
50 specific production and effects on sexually-associated behaviors [14,15]. Female pheromones act  
51 as a male attractant in both hermaphroditic *C. elegans* [12] and gonochoristic *C. remanei* [16].  
52 This female-based signaling appears to be related to the amount of sperm stored [16-18] and  
53 targets male-specific neurons [13,14,16,19,20]. Recent work has turned to male-produced  
54 ascarosides, showing that hermaphrodites exposed to male pheromones alone have a decrease in  
55 lifespan [21-24]. However, such male-produced pheromones do not appear to elicit a female  
56 mate choice response [12,16,22]. While ascarosides play a predominant role in mate choice, they  
57 also influence other population behaviors, thus necessitating a precise combination and  
58 concentration of small molecules for signaling specific to male-female interactions [11,14].  
59 Since pheromone cues depend on such a precise mixture, accurate intersex communication

60 assays necessitate a well-controlled environment where the concentration and diffusion of  
61 molecules is clearly defined and external signals are limited.

62         Microfluidic technology has proved to be an excellent method in which to study  
63 behavioral responses under precise environmental control [25-27]. Microfluidic devices scale on  
64 the nano- to micro-size and thus the small size of *Caenorhabditis* makes them suitable for  
65 manipulation within a microfluidic environment. Microfluidics offers many advantages over  
66 traditional plate-based assays, including better control of the concentration of molecules and  
67 their diffusion due to the laminar properties of microfluidics [28]. Several microfluidic devices  
68 have been designed to study behavioral responses such as chemotaxis, thermotaxis, and  
69 electrotaxis [25-27,29,30]. With respect to reproductive behavior, Chung et al. [29] found a  
70 behavioral response of individually isolated males when exposed to a uniform concentration of  
71 hermaphrodite-conditioned medium. In particular, they showed that males exposed to pre-  
72 conditioned medium spent more time performing sexually-associated behaviors than those  
73 exposed to a control medium. While their microfluidic device overcomes the issues of  
74 pheromone diffusion on agar plates, it cannot be used to study mate-choice searching patterns [as  
75 in 20,31] or direct choice comparisons between different attractants. Additionally, the  
76 pheromone signal contained in the pre-conditioned media is likely to decrease over the time  
77 required to study such locomotion patterns. Moreover, conditioned medium may be difficult to  
78 accurately reproduce as the concentration of small molecules will depend on the density of  
79 worms used to produce pheromones as well as the time spent in liquid culture. Given the  
80 limitations of exposure to a single pre-conditioned medium, the relationship between a  
81 pheromone signal and the elicited sexual response should be studied in real time. Given the

82 limitations of exposure to a single pre-conditioned medium, the relationship between a  
83 pheromone signal and the elicited sexual response should be studied in real time.

84 We describe a new microfluidic paradigm, using the Pheromone Arena microfluidic  
85 device, that overcomes the current limitations of traditional plate-based assays and existing  
86 microfluidic technology to study sex-specific mate choice with constant exposure to pheromones  
87 produced in real time. We show that the Pheromone Arena allows for small-molecule  
88 communication alone without a decay of signal over time, thus validating its use for mate choice  
89 assays. Using the Pheromone Arena, we show that males are more attracted to virgin females  
90 than mated ones in both *C. remanei* and *C. elegans* with the degree of attraction being species-  
91 dependent. Additionally, we show that females rely on pheromone cues, though their preference  
92 is dependent on mating status.

93

## 94 **Materials and Methods**

### 95 **Worm culture and strains**

96 Wildtype *Caenorhabditis remanei* (strain EM464) and feminized *C. elegans* (strain  
97 JK574: *fog-2* mutation on the standard N2 laboratory background) were used in this study.  
98 Feminization of *C. elegans* is achieved by blocking self-sperm production in hermaphrodites,  
99 making them functionally female, and they will be referred to thusly. Use of a feminized *C.*  
100 *elegans* hermaphrodites allowed for direct comparisons between species as well as preventing  
101 any potential mate cue effects due to self-sperm [see 17,18]. Both strains were grown at 20°C on  
102 NGM-agar plates seeded with OP50 *Escherichia coli* bacteria following Brenner [32].  
103 Synchronized cultures of stage 1 larvae were prepared by hypochlorite treatment of gravid  
104 females [33]. Larvae were matured to young adulthood in population densities of approximately

105 1,000 individuals. To maintain virgins, males and females were separated onto sex-specific  
106 plates of 40-50 individuals 40-45 hours post-larval stage 1. Mating plates of 25 females and 25  
107 males were created at the same time. At the start of all the choice assays, day 1 adult virgins  
108 were 48 hours post-larval stage 1 and day 2 adults were 72 hours post-larval stage 1 (24 hours  
109 after separation to virgin or mating plates).

### 110 **Microfluidic device manufacturing**

111 The Pheromone Arena (final design: v2.1; S1 File) was designed using CAD software  
112 (Vectorworks 2013 SP5, Nemetschek Vectorworks, Inc). Single layer devices were fabricated  
113 out of polydimethylsiloxane (PDMS) following soft lithography methods [34] and bonded to a  
114 glass microscopy slide following exposure to air plasma. Holes for connecting tubing were  
115 punched using a 1.25mm biopsy punch.

### 116 **Microfluidic set-up and experimental protocol**

117 To avoid blocking flow, air bubbles were evacuated from each device using a vacuum  
118 chamber and replaced with M9 buffer. Worms were loaded into three chambers: ten worms each  
119 were loaded into the two upstream “signaling” chambers of the device and 20 to 25 worms were  
120 loaded into the single downstream “choice” chamber. To control for environmental and  
121 observational biases, worm combinations were alternatively loaded into the left and right  
122 upstream chambers.

123 Liquid was flowed through all inlets continuously, with the start of flow corresponding to  
124 the beginning of an experiment. Flow was maintained at a constant rate using a pressurized air  
125 system (S1 Fig.). Specifically, air exiting a pressurized one gallon tank was regulated to 1.5 PSI.  
126 The air-line running from the tank was bifurcated to two tubing lines, each pressurizing a sealed  
127 500mL bottle of M9. The bottle caps were modified to hold seven pieces of tubing: one for the

128 air-line (terminating at the cap) and six liquid supply lines. The liquid tubing lines extended  
129 below the M9 surface, allowing liquid to flow out of the bottle and into the microfluidic device  
130 once air pressure was applied from the air-line. Tubing lengths were equal for each partition of  
131 the set-up to maintain equal flow through all lines. Pressure could be maintained for three hours  
132 off a single air tank.

133         The head position of each worm in the downstream chamber was counted every 30  
134 minutes and recorded as being located under the left or right upstream chamber. Worms located  
135 in the filter separators were not counted. If worms were flushed out of the downstream chamber  
136 (and therefore the device), the assay continued without counting these worms and thus some  
137 replicates had a decrease in sample size over time. If worms climbed or were flushed into a  
138 different chamber than the one into which they were loaded, the experiment was terminated.  
139 Each choice combination was replicated multiple times ( $n \geq 3$ ) over multiple days ( $n \geq 2$ ). Day 2  
140 adult worms were used for the male choice assays. Day 1 adult worms were used for female  
141 choice assays, except when comparing virgin versus mated female choice, which required using  
142 day 2 adult females. All data have been made available (S2 File).

### 143 **Statistical analyses**

144         Data were analyzed in R v3.2.1 (R Core Development Team 2015). Replicates were  
145 pooled for each choice assay by time point. An equality of proportions test was performed for  
146 each assay individually to determine if: i) males were more attracted to virgin females over  
147 mated females or ii) females were more attracted to virgin males over virgin females. The null  
148 hypothesis was that of no choice (using a probability of success = 0.5). A chi-square test for  
149 homogeneity was performed to determine if the proportion of males or females choosing virgin  
150 females or males, respectively, was equal across species combinations.

151

## 152 **Results**

### 153 **Microfluidic design**

154         The Pheromone Arena has three sequential components: three inlets with each with a  
155 distribution loading network, a main arena, and a single high resistance outlet (Fig. 1A). The  
156 arena area is further divided into three physically distinct chambers. The chambers all have a  
157 pillar-array to facilitate the natural, sinusoidal movement of worms [35,36]. The two upstream  
158 chambers hold the pheromone signalers. Two versions of the loading distribution networks were  
159 created to accommodate the size differences between males and females at day 2 of adulthood.  
160 Specifically, female signalers have a wider distribution network, while male signalers have a  
161 narrower distribution network coupled with the removal of the first two rows of pillars to prevent  
162 males from climbing out of the chamber (Fig. 1B). The upstream chambers are separated from  
163 the single, large downstream chamber by a very fine filter (Fig. 1C). This filter allows for small  
164 molecules to pass, but rarely can worms pass through. Worms making a choice were loaded into  
165 the downstream chamber by a third inlet. Due to laminar flow, two pheromone environments are  
166 created in the downstream chamber that mirror the signaling pair in the upstream chambers (Fig.  
167 1D). All the chambers were greater than one-by-one worm length, allowing for free movement of  
168 individuals without density effects (Fig 1E).

169         No inherent biases were measured in the movement of worms in the downstream  
170 chamber. In particular, when no pheromone cue was present, males were equally likely to move  
171 to the left of right sides of the chamber in a random fashion ( $p = 0.45$ ,  $n = 24$  replicates).

172         **Fig 1. Microfluidic Pheromone Arena for mate choice assays.**



173 (A) Blueprint for the Pheromone Arena (v2.1; S1 File). The three inlets correspond to the  
174 three worm chambers: inlets 1 and 2 connect to the upstream chambers and inlet 3  
175 connects to the downstream chamber. All the chambers have a pillar-array (shown as  
176 circles) spaced 100um apart to allow for natural worm movement. An 18um filter  
177 separates the downstream chamber from the upper two chambers and from the outlet.  
178 Extra resistance was added to the outlet distribution to decrease the overall flow rate. (B)  
179 Close-up of the loading distribution networks for the upstream chambers. The distribution  
180 network used depended on whether males or females were the pheromone signalers. (C)  
181 Close-up of the filter separating chambers. (D) Visualization of how the laminar flow  
182 dynamics create two distinct environments in the downstream chamber using red and  
183 blue dyes. (E) Visualization of worms in the device. After being loaded, worms move  
184 freely throughout their chamber without passing into another chamber.

## 185 **Males are attracted to virgin females**

186 Virgin *C. remanei* and *C. elegans* males were assayed for their ability to discriminate  
187 between conspecific virgin and mated females. Male choice was measured approximately every  
188 30 minutes for 3 hours. Across all replicates, male choice varied little after 60 minutes (S2 Fig.).  
189 Therefore, we used data from this time point as a single comparative measure of male choice  
190 across assays.

191 Males were more attracted to virgin females than mated females in both *C. remanei*  
192 (proportions test:  $\chi^2 = 46.2$ , d.f. = 1,  $p < 0.0001$ , 95% C.I. of virgin attraction = 72.6-87.1%) and  
193 *C. elegans* (proportions test:  $\chi^2 = 4.15$ , d.f. = 1,  $p = 0.04$ , 95% C.I. of virgin attraction = 50.3-  
194 64.8%), though the ability to discriminate was much weaker in *C. elegans* (Fig. 2). To better  
195 understand this marked difference in male sensitivity, male choice was assayed for the ability to

196 discriminate between virgin and mated heterospecific females. In both heterospecific crosses  
197 males were more attracted to virgin females than mated females (*C. remanei* male proportions  
198 test:  $\chi^2 = 42.0$ , d.f. = 1,  $p < 0.0001$ , 95% C.I. of virgin attraction = 66.1-78.7%; *C. elegans* male  
199 proportions test:  $\chi^2 = 24.2$ , d.f. = 1,  $p < 0.0001$ , 95% C.I. of virgin attraction = 64.1-80.9%). For  
200 example, *C. remanei* males chose virgin *C. elegans* females more successfully than in the  
201 conspecific *C. elegans* assay. Similarly, *C. elegans* males had a much high ability to discriminate  
202 virgins when they were presented with *C. remanei* females. The strength of attraction to virgins  
203 for both heterospecific assays was between that of the conspecific assays, suggesting species-  
204 dependent pheromone effects in both males and females ( $\chi^2 = 22.0$ , d.f. = 3,  $p < 0.0001$ ).

205 **Fig 2. Males are more attracted to virgin females than mated females within and**  
206 **between species.**

207 Virgin, day 2 adult *C. remanei* males (blue) and *C. elegans* males (orange) were given a  
208 choice between virgin and mated female pheromone (*C. remanei* females shown as  
209 circles and *C. elegans* females shown as triangles). Each replicate is represented as an  
210 individual point and the mean attraction to virgin females is given by the horizontal bar.  
211 Conspecific assays are shown as solid point and heterospecific assays as open points. The  
212 null hypothesis of no choice is given by the dashed line. In each assay males were more  
213 attracted to virgin females than mated ones. However, the strength of male attraction was  
214 dependent on the species of both the chooser and the signaler (Test of homogeneity  
215 across assays:  $\chi^2 = 22.0$ , d.f. = 3,  $p < 0.0001$ ). Asterisks denote a significant proportions  
216 test.

217 **Females choose male pheromone over those of from females**

218 Virgin *C. remanei* and *C. elegans* females were assayed for their ability to discriminate  
219 between conspecific virgin males and females. Female choice increased slightly over time, but  
220 was consistent by 60 minutes, again making this time point a reflective measure of overall  
221 female choice (S3 Fig.). Interestingly, *C. remanei* and *C. elegans* followed a similar trend in  
222 choice of males over time, though at very different magnitudes. Specifically, female *C. remanei*  
223 chose conspecific male pheromones over female pheromones (proportions test:  $\chi^2 = 14.8$ , d.f. =  
224 1,  $p < 0.001$ , 95% C.I. of male attraction = 58.0-74.0%) (Fig. 3). When females were given a  
225 choice between male pheromone and no pheromone, they still chose the male pheromone more  
226 than expected by chance ( $\chi^2 = 7.19$ , d.f. = 1,  $p < 0.01$ ), suggesting that females are in fact  
227 attracted to males and not simply repulsed by other females. However, *C. elegans* females  
228 showed no clear differentiation between conspecific males and females (proportions test:  $\chi^2 =$   
229 0.563, d.f. = 1,  $p = 0.45$ , 95% C.I. of male attraction = 45.0-61.8%). Moreover, the heterospecific  
230 assays also showed a lack of discrimination between male and female pheromones, suggesting  
231 that female choice may be species-specific, or at least very weak at best within *C. elegans*.

232 **Fig 3. Female choice of virgin males over virgin females is species-specific.**

233 Virgin, day 1 adult *C. remanei* females (blue) and *C. elegans* females (orange) were  
234 given a choice between virgin male and female pheromone (*C. remanei* females shown as  
235 circles and *C. elegans* females shown as triangles). Each replicate is represented as an  
236 individual point and the mean attraction to males is given by the horizontal bar.  
237 Conspecific assays are shown as solid point and heterospecific assays as open points. The  
238 null hypothesis of no choice is given by the dashed line. Only when *C. remanei* females  
239 were given a choice of conspecifics were they more attracted to male pheromone than

240 female pheromone ( $\chi^2 = 14.8$ , d.f. = 1,  $p < 0.001$ ). All other comparisons failed to reject  
241 the null hypothesis of no female choice. Asterisks denote a significant proportions test.

242 Additionally, we examined if female choice was dependent a female mating status. The  
243 female choice assay was replicated using mated and virgin *C. remanei* females. Virgin females  
244 showed a strong preference for virgin male over female pheromones (proportions test:  $\chi^2 = 17.5$ ,  
245 d.f. = 1,  $p < 0.0001$ , 95% C.I. of male attraction = 60.3-69.4%). However, mated females showed  
246 no obvious preference (proportions test:  $\chi^2 = 0.150$ , d.f. = 1,  $p = 0.70$ , 95% C.I. of male  
247 attraction = 38.0-57.5%).

#### 248 **Fig 4. Female attraction depends on mating status.**

249 Virgin (light purple) and mated (dark purple) day 2 adult *C. remanei* females were given  
250 a choice between virgin day 1 adult *C. remanei* male and female pheromones. Each  
251 replicate is represented as an individual point and the mean attraction to males is given by  
252 the horizontal bar. The null hypothesis of no choice is given by the dashed line. Virgin  
253 females showed a strong preference for males over females ( $\chi^2 = 17.5$ , d.f. = 1,  $p <$   
254  $0.0001$ ), while mated females displayed no choice ( $p = 0.70$ ). Asterisks denote a  
255 significant proportions test.

256

## 257 **Discussion**

258 Mate choice is ubiquitous across metazoans with sexual reproduction. Understanding the signal-  
259 receiver dynamics of mate choice beyond phenotypic traits – such as pheromone signals –  
260 provides valuable information on how individuals discern high quality mates with a propensity to  
261 mate. Here we proposed a new microfluidic paradigm to quantify pheromone communication in

262 nematodes. Our design allows for real time isolation of small molecules in a controlled  
263 environment as well as allowing for the natural searching and choice behaviors of receivers over  
264 time. While this design is not the first to use pillared-arenas [35-37], to the best of our  
265 knowledge no other worm-specific microfluidic devices have such a physically separated,  
266 sequential arena design. Moreover, the Pheromone Arena expands on previous worm choice  
267 devices [29,30] by allowing for natural searching behaviors in addition to measuring overall  
268 choice. Specifically, we examined male and female mate choice in *C. remanei* and *C. elegans*  
269 using a combination of conspecific and heterospecific assays to determine how mating status  
270 affects attraction. This study is the first use this combinatorial design coupled with real time  
271 pheromone signaling and spatial complexity.

272         The conspecific male choice results support previous studies [16,18] in showing that  
273 virgin males are strongly attracted to virgin females over mated females in both *C. elegans* and  
274 *C. remanei*. Interestingly, males from these species did not discriminate between female mating  
275 types with the same intensity [16]. In particular, *C. elegans* males had a reduced ability to  
276 discern virgin females from mated ones. However, when *C. elegans* males were presented with  
277 pheromones from *C. remanei* females, male attraction to virgins increased. Similarly, *C. remanei*  
278 males could distinguish between virgin and mated *C. elegans* females better than *C. elegans*  
279 males. Therefore, there appears to be a decrease in both female signal intensity as well as male  
280 receptor capability in *C. elegans*, leading to an overall decrease in mate choice ability. This  
281 diminution of choice is likely a result of the independent lineage transition to self-fertilizing  
282 hermaphroditism in *C. elegans*. Since fertilization is predominantly by selfing and males are rare  
283 within populations, sexual selection – apparently including mate recognition dynamics – is  
284 greatly reduced.

285           This hypothesis could be further tested by altering the number of signalers in the  
286 upstream chambers. The pheromone arena allows for exact control over the number of worms  
287 producing pheromone and, given the constant flow dynamics, altering the number of worms  
288 would in effect alter the concentration of pheromone signal in the downstream chamber.  
289 Previous studies have used various concentrations of hermaphrodite-conditioned media and  
290 found different results in male attraction [16,18]. Our assays used the same number of females in  
291 both upstream chambers, however, modulating the number of females in each upstream chamber  
292 is promising future work.

293           Previous work has shown that females are attracted to isolated, male-produced ascaroside  
294 cues [15,38], however, this result has not been replicated when the signal is produced *in vivo*. We  
295 took a novel approach comparing female discrimination between male and female produced  
296 pheromones to determine if females are truly attracted to males or are simply repulsed by the  
297 presence of a high number of other females. A discernable choice of males over females was  
298 measured in the *C. remanei* conspecific assays. Additionally, females were attracted to male  
299 pheromone over a no pheromone control, suggesting this choice measured is true attraction to  
300 males. Despite making a choice, the intensity with which females choose males was much  
301 weaker than seen for the male choice assays. This weak attraction could potentially explain why  
302 previous plate-based assays – where male signals can be lost by diffusion or mixed with other  
303 signals from the environment – could not measure any female choice of males [13,16]. However,  
304 *C. elegans* females made no choice in the conspecific assays as was also seen for both  
305 heterospecific assays, suggesting species-specific effects. Together these results suggest that  
306 when sexual selection is strong, as in *C. remanei*, males take a more active searching approach,  
307 such that females are predominantly signalers, while males are active receivers and searchers.

308 This signal-receiver dynamic is in somewhat of a sex-role reversal from traditional sexual  
309 selection models of male signaling and female receiving, though still consistent with anisogamy.

310 We further examine female choice based on a female's mating status. Mating status is  
311 known to influence remating behavior in many species, such that mated females – or females  
312 with sperm – typically have a lower propensity to remate [39,40]. Moreover, mated females will  
313 run away from males to avoid remating [41]. These observation is consistent with our results as  
314 virgin females strongly preferred male pheromones while mated females made no choice  
315 between male and female pheromones.

316 While the Pheromone Arena is both an innovative and effective tool, there are several  
317 limitations to its use. Namely, the difference in size between older adult males and females poses  
318 a problem for intersex comparisons. Additionally, the design could be improved by limiting  
319 worms from reaching other chambers through the filter separators. This cross-chamber  
320 movement was particularly an issue with males as they have a small diameter and a highly-  
321 developed searching behavior that leads them to attempt to crawl through the filters to reach the  
322 virgin females. However, the filter between the upstream and downstream chambers is currently  
323 at the lower limit of what can accurately be manufactured using PDMS-based microfluidics and  
324 thus a significant design change would be required to prevent this tenacious behavior.

325 Despite these limitations, the Pheromone Arena was able to reproduce previously seen  
326 sexual behavior responses and go further into the study of species-specific sexual attraction in  
327 both males and females. In the future, this type of device could be used to study the effect of  
328 density or sex ratio on sexual attraction. Moreover, it would be possible to modify these devices  
329 to allow food delivery and perform longer term assays or study the influence of food availability  
330 on sexual attraction. Such assays would benefit from being coupled with an automated system

331 [see 42] to obtain a more accurate counting via recordings and to facilitate high-throughput  
332 experiments.

333

## 334 **Acknowledgements**

335 We would like to thank Nadine Timmermeyer for prototyping Pheromone Arena v1.0 and Ben  
336 Blue for assistance with microfluidic manufacturing and advice on the pressurized air system.

337

## 338 **References**

- 339 1. Andersson M, Simmons LW. Sexual selection and mate choice. *Trends in Ecology &*  
340 *Evolution*. 2006;21: 296–302. doi:10.1016/j.tree.2006.03.015
- 341 2. Jones AG, Ratterman NL. Mate choice and sexual selection: what have we learned since  
342 Darwin? *Proc Natl Acad Sci USA*. National Acad Sciences; 2009;106 Suppl 1: 10001–  
343 10008. doi:10.1073/pnas.0901129106
- 344 3. Andersson MB. *Sexual selection*. Princeton University Press; 1994.
- 345 4. Wyatt TD. *Pheromones and animal behavior: communication by taste and smell*.  
346 Cambridge University Press; 2003.
- 347 5. Howard RW, Blomquist GJ. Chemical ecology and biochemistry of insect hydrocarbons.  
348 *Annu Rev Entomol*. 1982.
- 349 6. Howard RW, Blomquist GJ. Ecological, behavioral, and biochemical aspects of insect  
350 hydrocarbons. *Annu Rev Entomol*. 2005;50: 371–393.  
351 doi:10.1146/annurev.ento.50.071803.130359
- 352 7. Grillet M, Dartevelle L, Ferveur J-F. A *Drosophila* male pheromone affects female sexual  
353 receptivity. *Proc Royal Soc B*. 2006;273: 315–323. doi:10.1098/rspb.2005.3332
- 354 8. Ferveur J-F. Cuticular hydrocarbons: their evolution and roles in *Drosophila* pheromonal  
355 communication. *Behav Genet*. 2005;35: 279–295. doi:10.1007/s10519-005-3220-5
- 356 9. Brent CS, Byers JA, Levi-Zada A. An insect anti-antiaphrodisiac. *eLife*. eLife Sciences  
357 Publications Limited; 2017;6: 1765. doi:10.7554/eLife.24063
- 358 10. Barr M. Male mating behavior. *WormBook*. 2006;: 1–11. doi:10.1895/wormbook.1.78.1



- 359 11. Chute CD, Srinivasan J. Chemical mating cues in *C. elegans*. *Seminars in Cell and*  
360 *Developmental Biology*. Elsevier Ltd; 2014;33: 18–24. doi:10.1016/j.semcdb.2014.06.002
- 361 12. Simon JM, Sternberg PW. Evidence of a mate-finding cue in the hermaphrodite nematode  
362 *Caenorhabditis elegans*. *Proceedings of the National Academy of Sciences*. 2002;99:  
363 1598–1603. doi:10.1073/pnas.032225799
- 364 13. White JQ, Nicholas TJ, Gritton J, Truong L, Davidson ER, Jorgensen EM. The sensory  
365 circuitry for sexual attraction in *C. elegans* males. *Current Biology*. 2007;17: 1847–1857.  
366 doi:10.1016/j.cub.2007.09.011
- 367 14. Srinivasan J, Kaplan F, Ajredini R, Zachariah C, Alborn HT, Teal PEA, et al. A blend of  
368 small molecules regulates both mating and development in *Caenorhabditis elegans*.  
369 *Nature*. 2008;454: 1115–1118. doi:10.1038/nature07168
- 370 15. Izrayelit Y, Srinivasan J, Campbell SL, Jo Y, Reuss von SH, Genoff MC, et al. Targeted  
371 metabolomics reveals a male pheromone and sex-specific ascaroside biosynthesis in  
372 *Caenorhabditis elegans*. *ACS Chem Biol*. 2012;7: 1321–1325. doi:10.1021/cb300169c
- 373 16. Chasnov JR, So WK, Chan CM, Chow KL. The species, sex, and stage specificity of a  
374 *Caenorhabditis* sex pheromone. *Proceedings of the National Academy of Sciences*.  
375 2007;104: 6730–6735.
- 376 17. Morsci NS, Haas LA, Barr MM. Sperm status regulates sexual attraction in  
377 *Caenorhabditis elegans*. *Genetics*. 2011;189: 1341–1346.  
378 doi:10.1534/genetics.111.133603
- 379 18. Leighton DHW, Choe A, Wu SY, Sternberg PW. Communication between oocytes and  
380 somatic cells regulates volatile pheromone production in *Caenorhabditis elegans*. *Proc*  
381 *Natl Acad Sci USA*. 2014;111: 17905–17910. doi:10.1073/pnas.1420439111
- 382 19. Narayan A, Venkatachalam V, Durak O, Reilly DK, Bose N, Schroeder FC, et al.  
383 Contrasting responses within a single neuron class enable sex-specific attraction in  
384 *Caenorhabditis elegans*. *Proc Natl Acad Sci USA*. 2016;113: E1392–401.  
385 doi:10.1073/pnas.1600786113
- 386 20. Barrios A, Nurrish S, Emmons SW. Sensory regulation of *C. elegans* male mate-searching  
387 behavior. *Curr Biol*. 2008;18: 1865–1871. doi:10.1016/j.cub.2008.10.050
- 388 21. Aprison EZ, Ruvinsky I. Sexually Antagonistic Male Signals Manipulate Germline and  
389 Soma of *C. elegans* Hermaphrodites. *Curr Biol*. 2016. doi:10.1016/j.cub.2016.08.024
- 390 22. Shi C, Runnels AM, Murphy CT. Mating and male pheromone kill *Caenorhabditis* males  
391 through distinct mechanisms. *eLife*. 2017;6: S62. doi:10.7554/eLife.23493
- 392 23. Dong L, Cornaglia M, Lehnert T, Gijs MAM. On-chip microfluidic biocommunication  
393 assay for studying male-induced demise in *C. elegans* hermaphrodites. *Lab Chip*. Royal  
394 Society of Chemistry; 2016;16: 4534–4545. doi:10.1039/C6LC01005A

- 395 24. Maures TJ, Booth LN, Benayoun BA, Izrayelit Y, Schroeder FC, Brunet A. Males Shorten  
396 the Life Span of *C. elegans* Hermaphrodites via Secreted Compounds. *Science*. 2014;343:  
397 541–544. doi:10.1126/science.1244160
- 398 25. Gupta BP, Rezai P. Microfluidic approaches for manipulating, imaging, and screening *C.*  
399 *elegans*. *Micromachines*. 2016;7: 1–26. doi:10.3390/mi7070123
- 400 26. Bakhtina NA, Korvink JG. Microfluidic laboratories for *C. elegans* enhance fundamental  
401 studies in biology. *Rsc Advances*. 2014. doi:10.1039/C3RA43758B
- 402 27. Ben-Yakar A, Chronis N, Lu H. Microfluidics for the analysis of behavior, nerve  
403 regeneration, and neural cell biology in *C. elegans*. *Current Opinion in Neurobiology*.  
404 2009;19: 561–567. doi:10.1016/j.conb.2009.10.010
- 405 28. Squires TM, Quake SR. Microfluidics: Fluid physics at the nanoliter scale. *Rev Mod*  
406 *Phys. American Physical Society*; 2005;77: 977–1026. doi:10.1103/RevModPhys.77.977
- 407 29. Chung K, Zhan M, Srinivasan J, Sternberg PW, Gong E, Schroeder FC, et al. Microfluidic  
408 chamber arrays for whole-organism behavior-based chemical screening. *Lab Chip*.  
409 2011;11: 3689–3697. doi:10.1039/c1lc20400a
- 410 30. McCormick KE, Gaertner BE, Sottile M, Phillips PC, Lockery SR. Microfluidic Devices  
411 for Analysis of Spatial Orientation Behaviors in Semi-Restrained *Caenorhabditis elegans*.  
412 Samuel A, editor. *PLoS ONE*. 2011;6: e25710–8. doi:10.1371/journal.pone.0025710
- 413 31. Lipton J, Kleemann G, Ghosh R, Lints R, Emmons SW. Mate searching in *Caenorhabditis*  
414 *elegans*: a genetic model for sex drive in a simple invertebrate. *J Neurosci. Society for*  
415 *Neuroscience*; 2004;24: 7427–7434. doi:10.1523/JNEUROSCI.1746-04.2004
- 416 32. Brenner S. The genetics of *Caenorhabditis elegans*. *Genetics*. 1974;77: 71–94.
- 417 33. Kenyon C. The nematode *Caenorhabditis elegans*. *Science*. 1988;240: 1448–1453.
- 418 34. Qin D, Xia Y, Whitesides GM. Soft lithography for micro- and nanoscale patterning.  
419 *Nature Protocols*. 2010;5: 491–502. doi:10.1038/nprot.2009.234
- 420 35. Lockery SR, Lawton KJ, Doll JC, Faumont S, Coulthard SM, Thiele TR, et al. Artificial  
421 Dirt: Microfluidic Substrates for Nematode Neurobiology and Behavior. *Journal of*  
422 *Neurophysiology*. 2008;99: 3136–3143. doi:10.1152/jn.91327.2007
- 423 36. Park S, Hwang H, Nam S-W, Martinez F, Austin RH, Ryu WS. Enhanced *Caenorhabditis*  
424 *elegans* Locomotion in a Structured Microfluidic Environment. Brembs B, editor. *PLoS*  
425 *ONE*. 2008;3: e2550–5. doi:10.1371/journal.pone.0002550
- 426 37. Albrecht DR, Bargmann CI. High-content behavioral analysis of *Caenorhabditis elegans*  
427 in precise spatiotemporal chemical environments. *Nat Meth*. 2011;8: 599–605.  
428 doi:10.1038/nmeth.1630

- 429 38. Srinivasan J, Reuss von SH, Bose N, Zaslaver A, Mahanti P, Ho MC, et al. A Modular  
430 Library of Small Molecule Signals Regulates Social Behaviors in *Caenorhabditis elegans*.  
431 Sengupta P, editor. PLoS Biol. 2012;10: e1001237–14. doi:10.1371/journal.pbio.1001237
- 432 39. Chapman T. Seminal fluid-mediated fitness traits in *Drosophila*. *Heredity*. 2011;87: 511–  
433 521.
- 434 40. Yamane T, Goenaga J, Rönn JL, Arnqvist G. Male Seminal Fluid Substances Affect  
435 Sperm Competition Success and Female Reproductive Behavior in a Seed Beetle. Wicker-  
436 Thomas C, editor. PLoS ONE. 2015;10: e0123770–14. doi:10.1371/journal.pone.0123770
- 437 41. Garcia LR, LeBoeuf B, Koo P. Diversity in Mating Behavior of Hermaphroditic and  
438 Male-Female *Caenorhabditis Nematodes*. *Genetics*. 2007;175: 1761–1771.  
439 doi:10.1534/genetics.106.068304
- 440 42. Stroustrup N, Ulmschneider BE, Nash ZM, López-Moyado IF, Apfeld J, Fontana W. The  
441 *Caenorhabditis elegans* Lifespan Machine. *Nat Meth*. 2013;10: 665–670.  
442 doi:10.1038/nmeth.2475

443

## 444 **Supporting Information**

445 **S1 File. Pheromone Arena microfluidic design.** The Pheromone Arena has two versions to  
446 account for the difference in size between day 2 adult males and females: male choice of female  
447 signalers and female choice of male signalers. In the male choice version, the upstream loading  
448 distribution network is sized at 60um to account for the larger diameter of females, while the  
449 downstream chamber distribution channel has a final constriction size of 35um to prevent males  
450 from climbing back out of the downstream chamber. The female choice version has a smaller  
451 upstream distribution network (40um) and a larger downstream chamber distribution (60um).  
452 Additionally, in the female choice version the two upstream chambers have the first two rows of  
453 pillars removed, again to prevent males from climbing out of the device. Both versions have  
454 increased resistance added to the outflow to decreased the overall flow rate through the device.  
455 These blueprints are accessible using CAD software. A master height of 65um is recommended.  
456 **S2 File. Data.** Raw data for all male choice, female choice, and control experiments.

457 **S1 Fig. Pressurized air flow set-up.** A pressurized air system was used to maintain a constant  
458 flow rate through the microfluidic devices. A one gallon air tank was regulated to 1.5 PSI was  
459 sufficient to run experiments for up to 3 hours. The air-line running from the tank was bifurcated  
460 to pressurize two sealed 500mL bottles of M9 buffer. The bottle caps were modified to supply  
461 six liquid lines, which connected to two Pheromone Arenas, as well as hold the air-line, which  
462 terminated at the cap. The tubing lengths were equal for each partition of the set-up to maintain  
463 equal flow through all lines. The Pheromone Arena was kept on a confocal microscope at 20°C  
464 for the duration of each experiment. This figure was modified with permission from Stephen  
465 Banse.

466 **S2 Fig. Virgin male choice over time.** Virgin, day 2 adult *C. remanei* males were given a  
467 choice between virgin and mated conspecific female pheromone (blue) and *C. elegans* males  
468 were given a choice between virgin and mated conspecific female pheromone (orange). The  
469 weighted means and standard error are plotted over time. By 60 minutes into the experiment  
470 males had made a consistent choice (down triangle). The null hypothesis of no choice is given by  
471 the dashed line. In each assay males were more attracted to virgin females than mated ones.

472 **S3 Fig. Virgin female choice over time.** Virgin, day 1 adult *C. remanei* females were given a  
473 choice between virgin conspecific male and female pheromones (blue) and *C. elegans* males  
474 were given a choice between virgin conspecific male and female pheromones (orange). The  
475 weighted means and standard error are plotted over time. The null hypothesis of no choice is  
476 given by the dashed line. Only *C. remanei* females made a measurable choice of male  
477 pheromone over female pheromone.

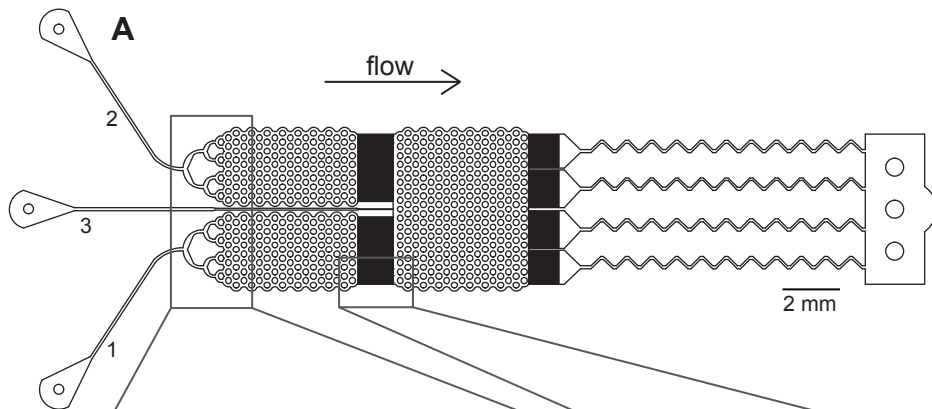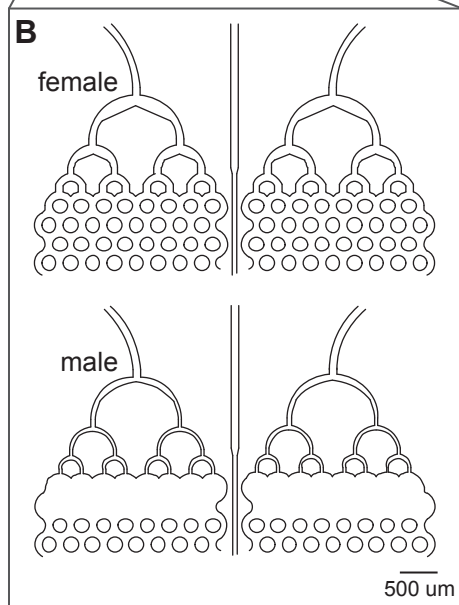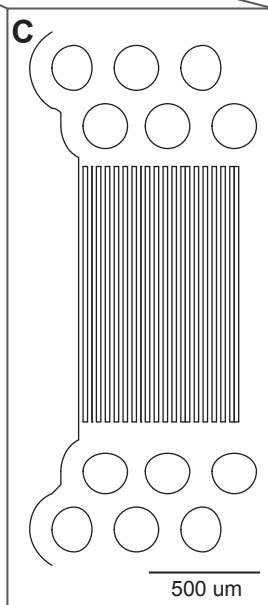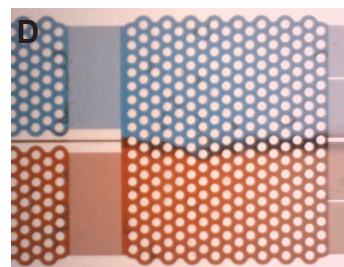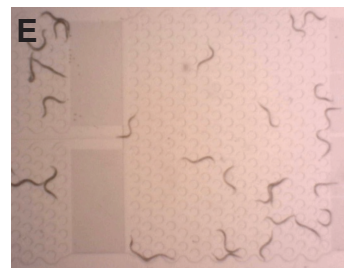

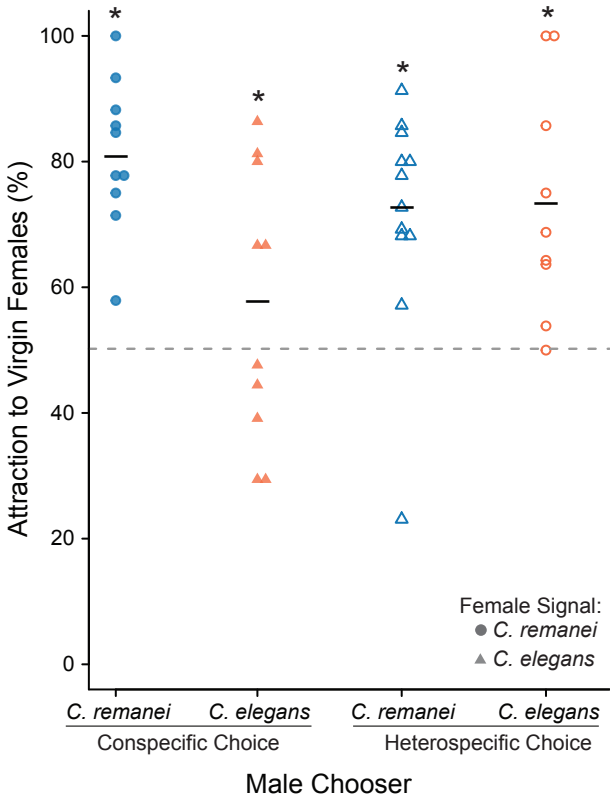

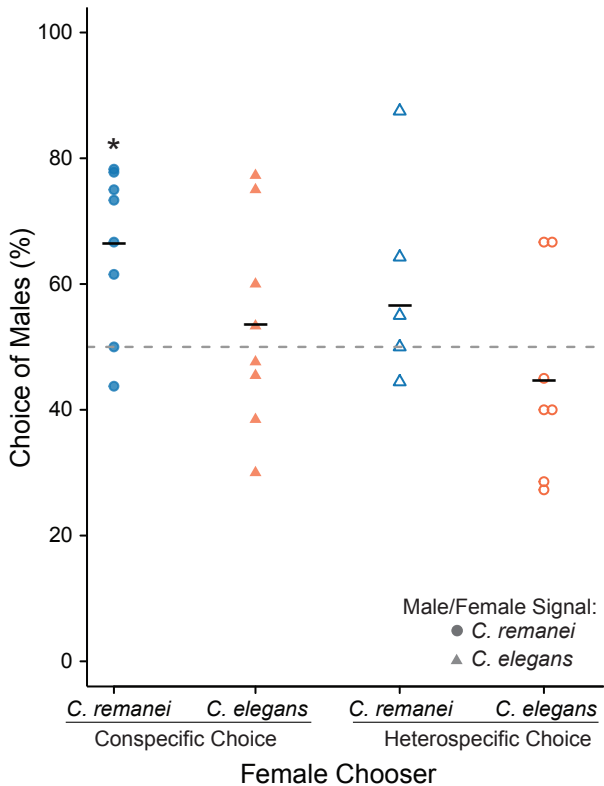

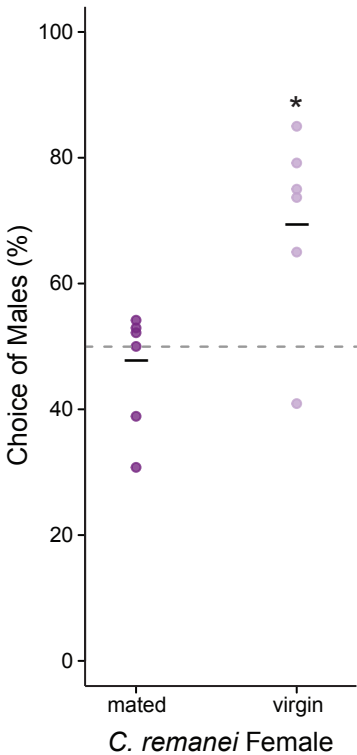

Source: https://www.biorxiv.org/content/10.1101/196733v1.full.pdf
